# Supplementary material
Source: PubMed Central journal article supplement (PMC4150371)
Supplement: Supp_Table1.pdf [file Supp_Table1.pdf]

**Supplemental Table 1A. DCCPS Program Funding the Biospecimen Grants**

| <b>DCCPS Program</b>                              | <b>Collecting new biospecimens</b> | <b>Using existing and collecting new biospecimens</b> | <b>Using existing biospecimens</b> | <b>Grand Total</b> |
|---------------------------------------------------|------------------------------------|-------------------------------------------------------|------------------------------------|--------------------|
| ARP (Applied Research Program)                    | 7                                  |                                                       | 8                                  | 15                 |
| BRP (Behavioral Research Program)                 | 82                                 | 4                                                     | 6                                  | 92                 |
| EGRP (Epidemiology and Genomics Research Program) | 66                                 | 82                                                    | 181                                | 329                |
| OCS (Office of Cancer Survivorship)               | 12                                 | 3                                                     | 1                                  | 16                 |
| OD (Office of the Director)                       | 1                                  | 1                                                     | 1                                  | 3                  |
| <b>Grand Total</b>                                | <b>168</b>                         | <b>90</b>                                             | <b>197</b>                         | <b>455</b>         |

**Supplemental Table 1B. Grant Funding Mechanisms in the Biospecimen Grants**

| <b>Grant Activity Code*</b> | <b>Collecting new biospecimens</b> | <b>Using existing and collecting new biospecimens</b> | <b>Using existing biospecimens</b> | <b>Grand Total</b> |
|-----------------------------|------------------------------------|-------------------------------------------------------|------------------------------------|--------------------|
| P01                         | 3                                  | 4                                                     | 3                                  | 10                 |
| P50                         | 1                                  | 2                                                     | 1                                  | 4                  |
| R01                         | 121                                | 59                                                    | 129                                | 309                |
| R03                         | 11                                 | 2                                                     | 29                                 | 42                 |
| R15                         |                                    |                                                       | 1                                  | 1                  |
| R21                         | 16                                 | 6                                                     | 11                                 | 33                 |
| R33                         |                                    |                                                       | 2                                  | 2                  |
| R37                         | 1                                  | 1                                                     |                                    | 2                  |
| RC1                         | 1                                  |                                                       | 2                                  | 3                  |
| RC2                         |                                    |                                                       | 1                                  | 1                  |
| U01                         | 8                                  | 8                                                     | 16                                 | 32                 |
| U19                         | 2                                  | 2                                                     | 1                                  | 5                  |
| U24                         |                                    | 6                                                     |                                    | 6                  |
| U54                         | 4                                  |                                                       | 1                                  | 5                  |
| <b>Grand Total</b>          | <b>168</b>                         | <b>90</b>                                             | <b>197</b>                         | <b>455</b>         |

\* Refer to the NIH Office of Extramural Research website, Grants & Funding, Types of Grant Programs: [http://grants.nih.gov/grants/funding/funding\\_program.htm](http://grants.nih.gov/grants/funding/funding_program.htm)
