# Supplementary material
Source: PubMed Central journal article supplement (PMC4150371)
Supplement: Supp_Table2.pdf [file Supp_Table2.pdf]

Supplemental Table 2. Grants by Biospecimen Type and Cancer Type (for Carrick et al, 2014)

| Cancer Type                     | Biospecimen Type |       |       |              |               |            |     |            |      |        |                |       |               |     |                      |            |             |       |      |     |       |
|---------------------------------|------------------|-------|-------|--------------|---------------|------------|-----|------------|------|--------|----------------|-------|---------------|-----|----------------------|------------|-------------|-------|------|-----|-------|
|                                 | TOTAL            | TOTAL | Blood | Serum/Plasma | Buccal/Saliva | Cell Lines | DNA | Buffy Coat | PBLs | Tissue | Tissue Culture | Urine | Cervical Swab | RNA | Saliva for Biomarker | Blood Spot | Bone Marrow | Stool | Clot | RBC | Other |
|                                 | N                | Col % | N     | N            | N             | N          | N   | N          | N    | N      | N              | N     | N             | N   | N                    | N          | N           | N     | N    | N   | N     |
| Blood Cancers                   | 59               | 13%   | 41    | 24           | 19            | 4          | 43  | 9          | 7    | 29     | 3              | 6     | 0             | 3   | 4                    | 2          | 7           | 0     | 1    | 1   | 2     |
| Bladder                         | 5                | 1%    | 4     | 2            | 2             | 0          | 3   | 1          | 2    | 3      | 0              | 2     | 0             | 0   | 1                    | 0          | 0           | 0     | 1    | 0   | 0     |
| Pancreatic                      | 7                | 2%    | 3     | 3            | 4             | 0          | 5   | 3          | 0    | 5      | 0              | 2     | 0             | 0   | 0                    | 0          | 0           | 0     | 0    | 0   | 0     |
| Stomach                         | 8                | 2%    | 7     | 5            | 2             | 0          | 6   | 1          | 2    | 4      | 0              | 2     | 0             | 1   | 0                    | 0          | 0           | 2     | 0    | 0   | 0     |
| Endometrial Uterine             | 9                | 2%    | 8     | 5            | 4             | 0          | 5   | 2          | 1    | 4      | 0              | 2     | 0             | 0   | 1                    | 0          | 0           | 0     | 0    | 0   | 0     |
| Liver/Gallbladder               | 9                | 2%    | 5     | 8            | 2             | 0          | 5   | 2          | 2    | 4      | 0              | 3     | 0             | 1   | 0                    | 0          | 0           | 0     | 0    | 0   | 0     |
| Head/Neck/Oral                  | 11               | 2%    | 6     | 5            | 4             | 1          | 8   | 2          | 1    | 5      | 1              | 2     | 0             | 2   | 3                    | 0          | 0           | 0     | 1    | 1   | 1     |
| Melanoma and Other Skin Cancers | 25               | 5%    | 10    | 5            | 7             | 1          | 18  | 3          | 3    | 12     | 0              | 0     | 0             | 2   | 0                    | 0          | 0           | 0     | 0    | 0   | 4     |
| CNS/Brain/Spinal Cord           | 17               | 4%    | 9     | 8            | 9             | 0          | 14  | 4          | 2    | 13     | 0              | 1     | 0             | 0   | 1                    | 1          | 0           | 0     | 0    | 0   | 0     |
| Ovarian                         | 26               | 6%    | 13    | 8            | 10            | 1          | 16  | 5          | 1    | 15     | 1              | 2     | 0             | 1   | 2                    | 0          | 0           | 0     | 0    | 0   | 0     |
| Lung Bronchus                   | 30               | 7%    | 14    | 11           | 6             | 1          | 22  | 5          | 5    | 15     | 0              | 5     | 0             | 1   | 0                    | 0          | 0           | 0     | 0    | 0   | 0     |
| Prostate                        | 44               | 10%   | 19    | 20           | 7             | 0          | 37  | 12         | 7    | 22     | 0              | 8     | 0             | 1   | 0                    | 0          | 0           | 0     | 1    | 3   | 2     |
| Smoking/Substance Abuse         | 53               | 12%   | 11    | 10           | 7             | 0          | 8   | 1          | 0    | 1      | 0              | 10    | 0             | 0   | 37                   | 1          | 0           | 0     | 0    | 0   | 1     |
| Colorectal/Anal                 | 60               | 13%   | 25    | 31           | 11            | 3          | 44  | 18         | 7    | 32     | 1              | 8     | 0             | 2   | 1                    | 0          | 0           | 5     | 1    | 3   | 1     |
| Breast                          | 131              | 29%   | 72    | 60           | 28            | 8          | 86  | 25         | 13   | 44     | 1              | 28    | 0             | 0   | 5                    | 3          | 0           | 0     | 3    | 4   | 0     |
| Cervical                        | 21               | 5%    | 11    | 10           | 2             | 0          | 15  | 2          | 5    | 11     | 0              | 4     | 13            | 2   | 2                    | 0          | 0           | 0     | 1    | 0   | 2     |
| Other                           | 46               | 10%   | 30    | 22           | 12            | 3          | 25  | 3          | 7    | 16     | 1              | 5     | 0             | 2   | 4                    | 2          | 1           | 1     | 0    | 1   | 2     |

\* "Other" cancer types included Kaposi's sarcoma, sarcomas, mesothelioma, Hodgkin's, thyroid cancer, cancer metastatic to lymph nodes, kidney cancer, testicular cancer, esophageal cancer, and cancer in general.
